# Supplementary material
Source: PubMed Central journal article supplement (PMC6318703)

## **Supplemental Information**

### **CD7 CAR T Cells for the Therapy of Acute Myeloid Leukemia**

**Diogo Gomes-Silva, Erden Atilla, Pinar Ataca Atilla, Feiyan Mo, Haruko Tashiro, Madhuwanti Srinivasan, Premal Lulla, Rayne H. Rouce, Joaquim M.S. Cabral, Carlos A. Ramos, Malcolm K. Brenner, and Maksim Mamonkin**

Figure S1

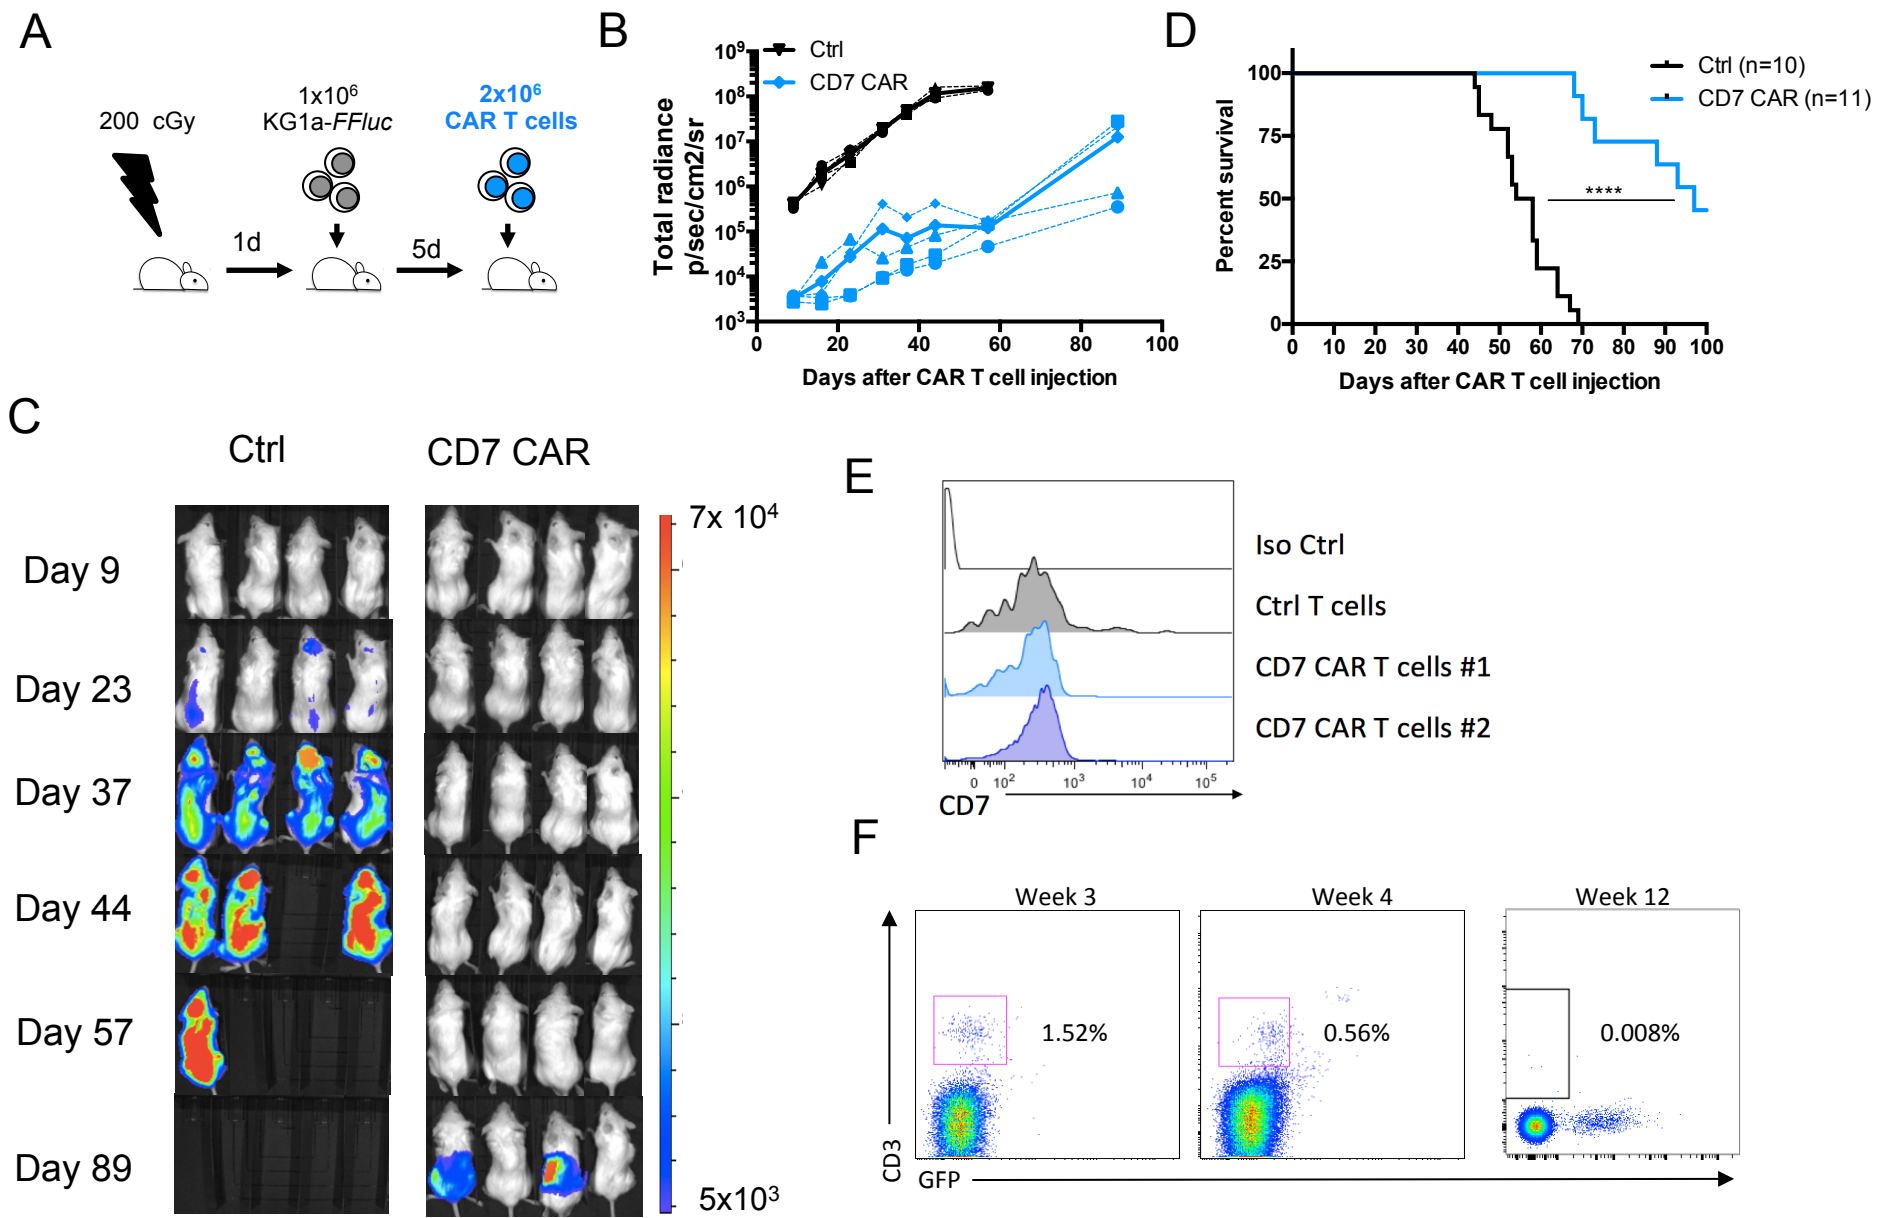

Supplement: mmc1.pdf [file mmc1.pdf]
